# Supplementary material for: A Multiple Reaction Monitoring (MRM) Method to Detect Bcr-Abl Kinase Activity in CML Using a Peptide Biosensor
Source: PLoS One. 2013 Feb 20;8(2):e56627. doi: 10.1371/journal.pone.0056627 (PMC3577862; doi:10.1371/journal.pone.0056627)
Supplement: Table S2 — A table of calculations for all MRM experiments is available as Table S2. (XLSX) [file pone.0056627.s003.xlsx]

## Sheet: Sheet1
Blank	580-480	580-604	540-604	540-767
AUC (@RT)	30	28	15	11
LOD	0.5 fmol	5 fmol	0.5 fmol	0.5 fmol
LOQ	5 fmol	<10 fmol	5 fmol	1 fmol
Calibration	fmol	580-480	580-604	540-604	540-767	580-480	580-604	540-604	540-767	%phospho (480/604)		%phospho (604/767)		%phospho (480/767)		%phospho (604/604)								42731
	5	476	74	384	350	399	51	412	339	55.3488	49.1985	17.4528	13.0769	57.6271	54.065	16.1572	11.0151
	10	1077	142	839	774	942	147	963	702	56.2109	49.4488	15.5022	17.3145	58.1848	57.2993	14.475	13.2432
	50	5814	889	4793	4043	6119	839	4888	4226	54.8129	55.5919	18.0251	16.5647	58.9835	59.1493	15.6459	14.6499
	100	11097	1612	9092	8010	11987	1574	9689	8413	54.9656	55.3008	16.7533	15.7605	58.0782	58.7598	15.0598	13.975
	250	27862	4013	23118	19499	29085	4150	23275	19456	54.6528	55.5481	17.0679	17.5803	58.829	59.9184	14.7912	15.1322
	1/slopes	0.008972	0.06238	0.0108	0.01281
	lysate only	17342		Raw AUC			fmol		corrected AUC
		normalizer	correction factor	580-480	580-604	540-604	540-767		580-480	580-604	540-604	540-767	% phospho signal	580-480	580-604	540-604	540-767	%phospho
1	P	225143	2.37531	1437	282	3794	2906		604.973	118.721	1597.26	1223.42	27.4708	5.42782	7.40583	17.2504	15.672	23.934
	P+G	75393	0.795414	0	0	1923	1470		0	0	2417.61	1848.09	0	0	0	26.1102	23.6741	0
	P+V	58997	0.622433	2191	425	816	761		3520.06	682.805	1310.99	1222.62	72.8633	31.582	42.5934	14.1586	15.6618	69.0458
2	P	74783	0.788979	330	181	1844	1730		418.262	229.41	2337.2	2192.71	15.1794	3.75265	14.3106	25.2417	28.0886	12.9427
	P+G	62427	0.65862	0	0	1736	1329		0	0	2635.81	2017.86	0	0	0	28.4668	25.8487	0
	P+V	60773	0.64117	731	170	767	634		1140.1	265.14	1196.25	988.818	48.7984	10.229	16.5395	12.9195	12.6668	44.1886
3	P	98190	1.03593	481	204	2629	1889		464.318	196.925	2537.82	1823.49	15.4662	4.16586	12.2842	27.4085	23.3588	13.1938
	P+G	85958	0.906878	0	0	4467	3619		0	0	4925.69	3990.62	0	0	0	53.1975	51.1198	0
	P+V	111397	1.17527	1356	314	1470	1017		1153.78	267.174	1250.78	865.337	47.983	10.3517	16.6663	13.5084	11.085	43.385
	avg	94784.6
